# Supplementary material
Source: PubMed Central journal article supplement (PMC4153354)

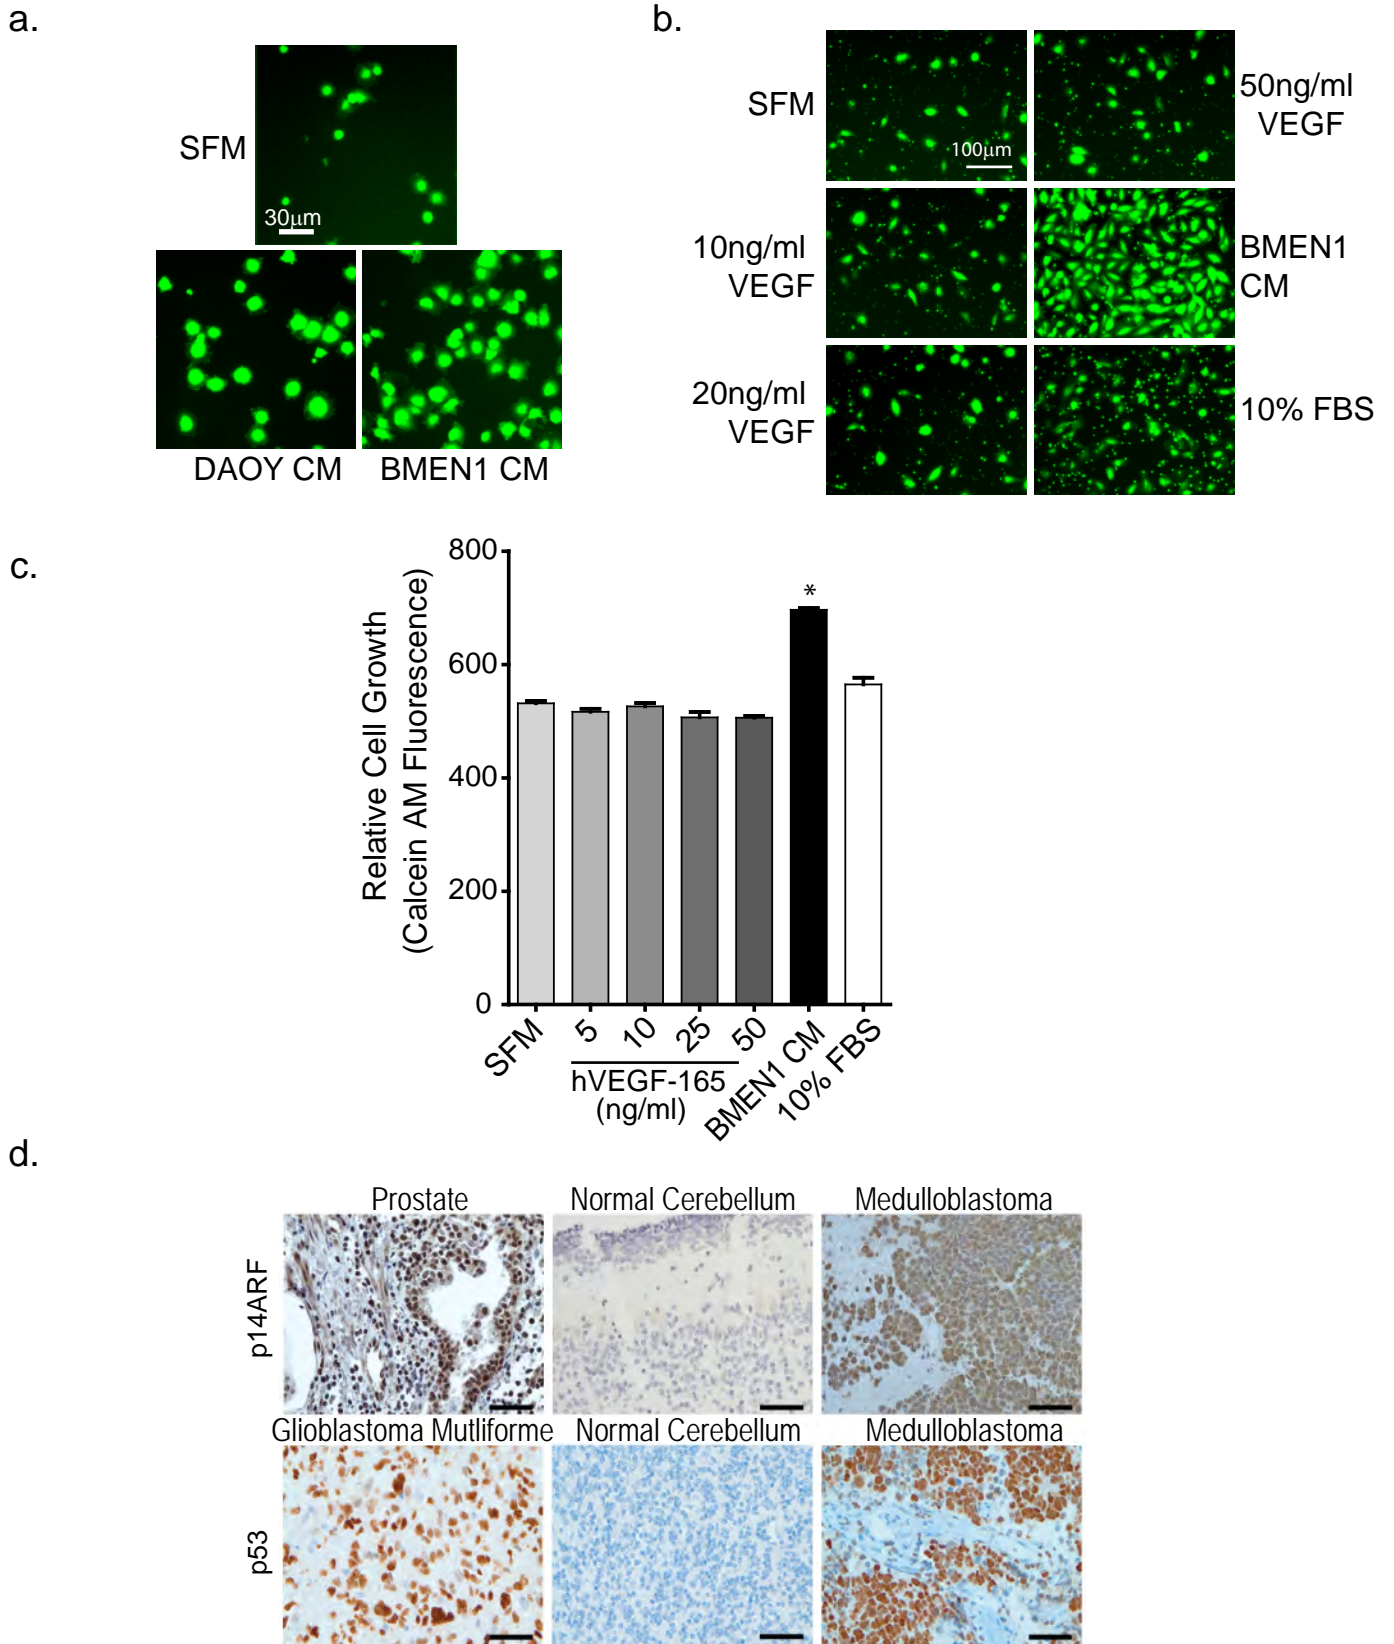

Supplement: NIHMS609855-supplement-02.pdf [file NIHMS609855-supplement-02.pdf]
